# Supplementary material
Source: HighWire-hosted journal article supplement (https://jnm.snmjournals.org/highwire/filestream/109078/field_highwire_adjunct_files/0/263255_Supplemental_Data.pdf)
Supplement: 263255_Supplemental_Data.pdf [file 263255_Supplemental_Data.pdf]

### **Neuropsychological evaluation**

Participants were administered the Mini Mental State Examination (MMSE), the Clinical Dementia Rating (CDR), Geriatric Depression Scale (GDS), Hospital Anxiety and Depression Scale (HADS), and a battery of neuropsychological tests. The primary cognitive performance measures were the composite memory and non-memory scores, and the AIBL-PACC score that were calculated as previously described.(1,2) Briefly, we calculated a composite episodic memory score from the mean of the z-scores (means and standard deviation for creating the z-scores were generated using data from 65 cognitively normal controls with both low <sup>11</sup>C-PiB PET retention and normal MRI as the reference) for Rey complex figure test (RCFT, 30 min) long delay, the delayed recall from the California verbal learning test second edition (CVLT-II), and Logical Memory II. We calculated a composite non-memory score by taking the mean of the z scores for the Boston naming test, letter fluency, category fluency, digit span forwards and backwards, digit symbol-coding, and RCFT copy. (1) The AIBL-PACC score was calculated from the mean of the z-scores of the delayed recall from CVLT-II and Logical Memory II, the digit symbol substitution Test and the MMSE total score. (2)

Supplemental Figure 1. Correlation between  $^{18}\text{F}$ -SMBT-1 binding and  $\text{A}\beta$  burden

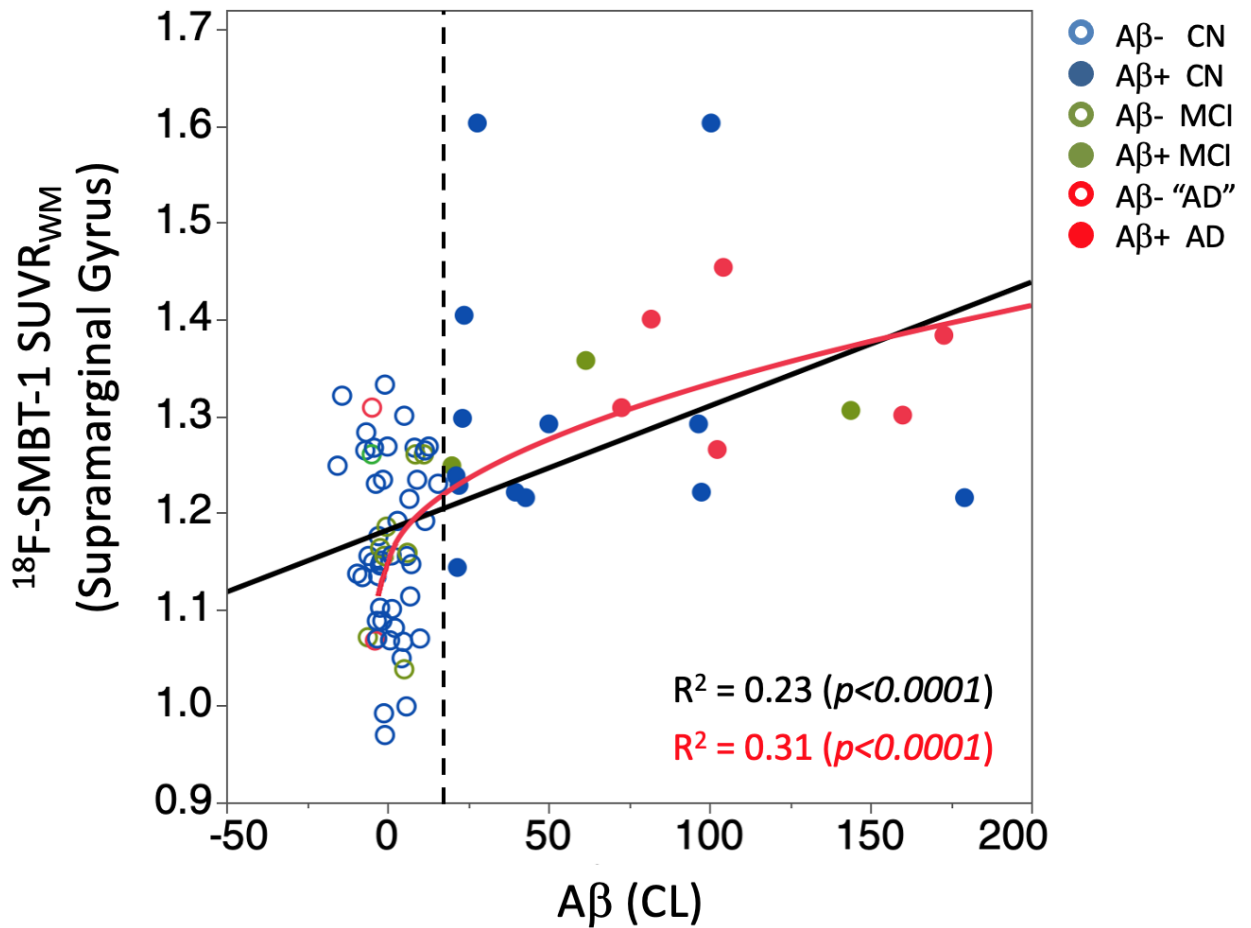

Linear and non-linear associations between  $^{18}\text{F}$ -SMBT-1 binding in the supramarginal gyrus and global  $\text{A}\beta$  burden. The non-linear fit better described the relationship between  $^{18}\text{F}$ -SMBT-1 binding and  $\text{A}\beta$  burden, suggesting that the  $^{18}\text{F}$ -SMBT-1 signal starts increasing before  $\text{A}\beta$  becomes abnormal.

The dotted line denotes the 20 CL use to separate high from low  $\text{A}\beta$ .

Linear fit:  $y = a + b \cdot x$

Square root fit:  $y = a + b \cdot \text{Sqrt}(x)$

Supplemental Figure 2. Correlation between  $^{18}\text{F}$ -SMBT-1 binding and  $\text{A}\beta$  accumulation

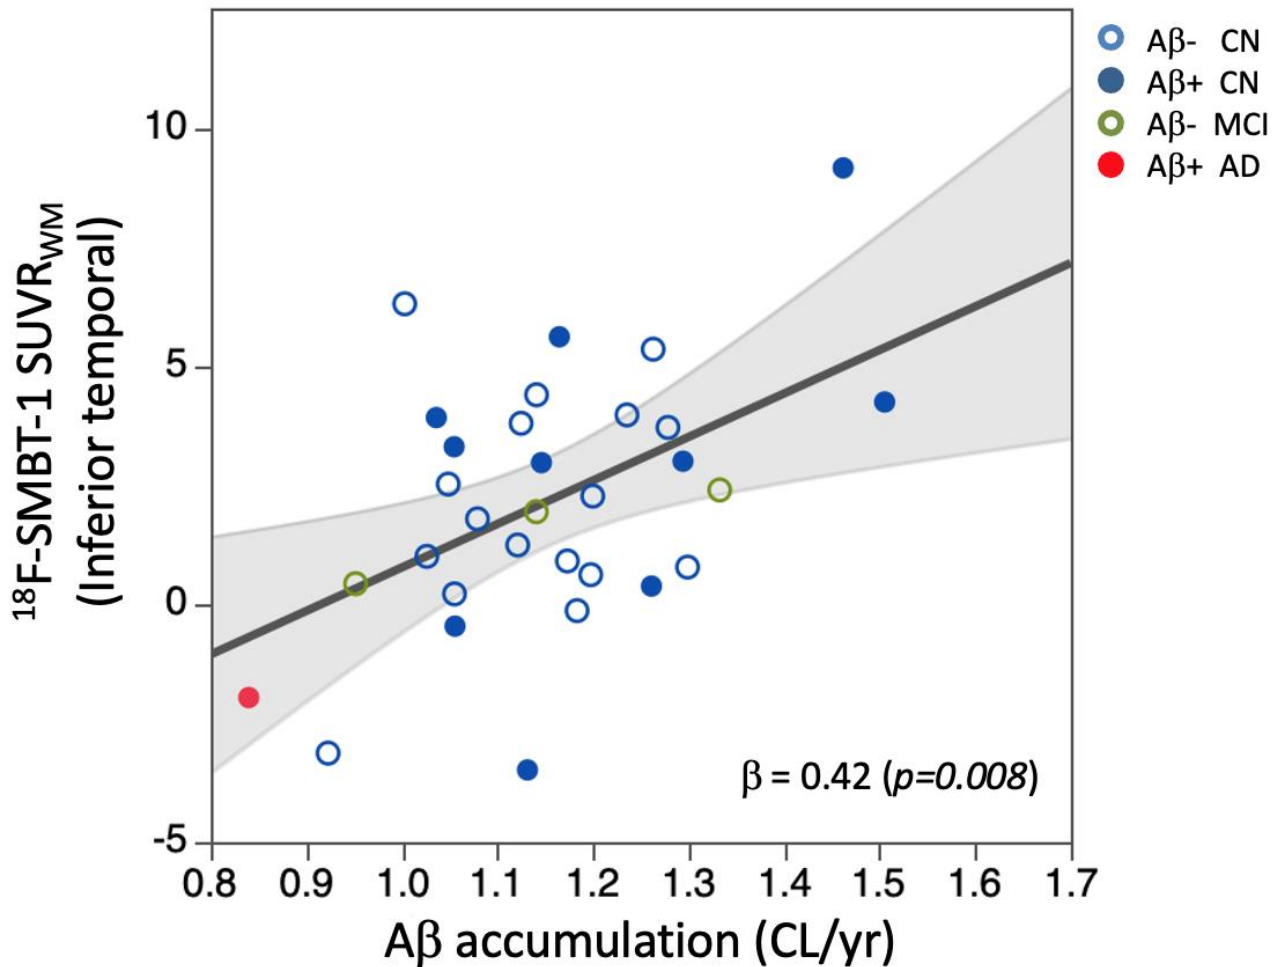

Linear association between  $^{18}\text{F}$ -SMBT-1 binding in the inferior temporal and global rates of  $\text{A}\beta$  accumulation in 31 participants (1  $\text{A}\beta$ + AD, 3  $\text{A}\beta$ - MCI, 17  $\text{A}\beta$ - and 10  $\text{A}\beta$ + CN) with available  $\text{A}\beta$  imaging longitudinal data. The association suggests that the  $^{18}\text{F}$ -SMBT-1 signal in the inferior temporal is higher on those participants with higher rates of  $\text{A}\beta$  accumulation. Association was adjusted for age, sex and baseline  $\text{A}\beta$  burden.

**SUPPLEMENTAL TABLE 1. Demographics of cognitively unimpaired controls (CN) and Alzheimer's disease (AD) patients by amyloid status**

|                                | A $\beta$ - CN  | A $\beta$ + CN  | A $\beta$ - MCI  | A $\beta$ + MCI  | A $\beta$ - AD   | A $\beta$ + AD   |
|--------------------------------|-----------------|-----------------|------------------|------------------|------------------|------------------|
| n                              | 44              | 13              | 9                | 3                | 2                | 6                |
| Age                            | 76.0 $\pm$ 4.8  | 78.9 $\pm$ 5.5  | 72.8 $\pm$ 6.6   | 75.1 $\pm$ 2.8   | 66.5 $\pm$ 3.5   | 79.7 $\pm$ 4.8   |
| Sex                            | 25F/19M         | 7F/6M           | 4F/5M            | 0F/3M            | 1F/1M            | 4F/2M            |
| Education (years)              | 14.8 $\pm$ 2.7  | 14.7 $\pm$ 3.2  | 10.0 $\pm$ 1.7*  | 11.7 $\pm$ 4.2   | 10.9 $\pm$ 1.8   | 10.3 $\pm$ 1.3*  |
| %APOE4                         | 30%             | 69%*            | 22%              | 33%              | 0%               | 80%*             |
| MMSE                           | 28.6 $\pm$ 1.5  | 28.6 $\pm$ 1.6  | 28.4 $\pm$ 1.7   | 26.3 $\pm$ 0.6*  | 26.0 $\pm$ 1.4   | 23.5 $\pm$ 4.6*  |
| CDR                            | 0.05 $\pm$ 0.1  | 0.00 $\pm$ 0.0  | 0.28 $\pm$ 0.3*  | 0.50 $\pm$ 0.0*  | 0.75 $\pm$ 0.4   | 0.67 $\pm$ 0.3*  |
| CDR SoB                        | 0.07 $\pm$ 0.2  | 0.00 $\pm$ 0.0  | 0.39 $\pm$ 0.3*  | 0.67 $\pm$ 0.3*  | 4.50 $\pm$ 0.7   | 6.50 $\pm$ 2.4*  |
| Episodic Memory                | 0.12 $\pm$ 0.9  | 0.28 $\pm$ 0.6  | -1.03 $\pm$ 0.5* | -1.19 $\pm$ 0.5* | -1.96 $\pm$ 0.0* | -3.58 $\pm$ 1.5* |
| Non-Memory                     | -0.07 $\pm$ 0.6 | -0.04 $\pm$ 0.7 | -0.90 $\pm$ 0.6* | -0.76 $\pm$ 0.2* | -0.90 $\pm$ 0.1* | -2.90 $\pm$ 1.8* |
| AIBL PACC                      | 0.07 $\pm$ 0.7  | 0.15 $\pm$ 0.6* | -0.76 $\pm$ 0.7* | -1.11 $\pm$ 0.4* | -2.56 $\pm$ 0.0* | -4.53 $\pm$ 2.1* |
| Hippocampus (cc)               | 5.94 $\pm$ 0.5  | 5.83 $\pm$ 0.4  | 5.81 $\pm$ 0.9   | 5.73 $\pm$ 0.8   | 5.71 $\pm$ 0.2   | 4.50 $\pm$ 0.5*  |
| Cortical GM (cc)               | 472 $\pm$ 38    | 452 $\pm$ 14    | 468 $\pm$ 10     | 465 $\pm$ 14     | 452 $\pm$ 27     | 419 $\pm$ 13*    |
| WM (cc)                        | 387 $\pm$ 27    | 390 $\pm$ 22    | 388 $\pm$ 18     | 383 $\pm$ 17     | 381 $\pm$ 52     | 390 $\pm$ 19     |
| Ventricles (cc)                | 34.0 $\pm$ 15   | 33.0 $\pm$ 7    | 35.1 $\pm$ 22    | 42.0 $\pm$ 38    | 39.6 $\pm$ 19    | 45.0 $\pm$ 12    |
| WMH (cc)                       | 5.41 $\pm$ 6.9  | 4.25 $\pm$ 5.6  | 4.54 $\pm$ 7.8   | 4.79 $\pm$ 6.0   | 5.44 $\pm$ 6     | 22.7 $\pm$ 21*   |
| A $\beta$ burden (CL)          | 0.79 $\pm$ 6.9  | 57.5 $\pm$ 48*  | 1.96 $\pm$ 6.2   | 75.3 $\pm$ 63*   | -4.25 $\pm$ 0.6  | 116 $\pm$ 41*    |
| A $\beta$ accumulation (CL/yr) | 0.61 $\pm$ 2.6  | 5.32 $\pm$ 4.6* | -0.22 $\pm$ 0.1  | -                | -                | 4.08             |
| Tau Me (SUVR)                  | 0.89 $\pm$ 0.2  | 1.16 $\pm$ 0.2* | 1.00 $\pm$ 0.1   | 1.58 $\pm$ 0.4*  | 0.88 $\pm$ 0.3   | 2.05 $\pm$ 1.1*  |
| Tau Te (SUVR)                  | 1.02 $\pm$ 0.2  | 1.13 $\pm$ 0.1  | 1.13 $\pm$ 0.1   | 1.42 $\pm$ 0.2*  | 1.06 $\pm$ 0.2   | 2.52 $\pm$ 1.2*  |
| Tau R (SUVR)                   | 0.90 $\pm$ 0.1  | 0.93 $\pm$ 0.1  | 0.98 $\pm$ 0.1   | 1.10 $\pm$ 0.0*  | 0.97 $\pm$ 0.3   | 1.84 $\pm$ 0.8*  |
| Tau MT (SUVR)                  | 0.98 $\pm$ 0.2  | 1.18 $\pm$ 0.2  | 1.10 $\pm$ 0.1   | 1.56 $\pm$ 0.3   | 1.00 $\pm$ 0.3   | 2.39 $\pm$ 1.3*  |
| %Tau+                          | 9%              | 46%*            | 22%*             | 100%*            | 50%*             | 75%*             |

### Abbreviations

CN: elderly controls; MCI: mild cognitive impairment; AD: Alzheimer's disease; APOE: Apolipoprotein E; MMSE: Mini mental State Examination; CDR: Clinical Dementia Rating; CDR SoB: Clinical Dementia Rating Sum of Boxes; AIBL PACC: the Australian Imaging Biomarkers and Lifestyle's Preclinical Alzheimer Cognitive Composite. GM: Grey matter; WM: White Matter; WMH: White Matter Hyperintensities; SUVR: Standard Uptake Value Ratio. CL: Centiloids; Me: Mesial Temporal; Te: Temporoparietal; MT: Meta temporal; R: Rest of neocortex.

\* Significantly different from A $\beta$ - controls ( $p < 0.05$ )

**SUPPLEMENTAL TABLE 2. Regional <sup>18</sup>F-SMBT-1 SUVR across clinical groups stratifies by Aβ status**

|                          | Aβ- CN<br>SUVR <sub>WM</sub><br>(n=44) | Aβ+ CN<br>SUVR <sub>WM</sub><br>(n=13) | <i>d</i>     | Aβ- MCI<br>SUVR <sub>WM</sub><br>(n=9) | <i>d</i>     | Aβ+ MCI<br>SUVR <sub>WM</sub><br>(n=3) | <i>d</i>     | Aβ- "AD"<br>SUVR <sub>WM</sub><br>(n=2) | Aβ+ AD<br>SUVR <sub>WM</sub><br>(n=6) | <i>d</i>     |
|--------------------------|----------------------------------------|----------------------------------------|--------------|----------------------------------------|--------------|----------------------------------------|--------------|-----------------------------------------|---------------------------------------|--------------|
| Dorsolateral Prefrontal  | 1.05 ± 0.09                            | 1.08 ± 0.17                            | <b>0.22</b>  | 1.07 ± 0.10                            | <b>0.21</b>  | 1.18 ± 0.07                            | <b>1.61</b>  | 1.10 ± 0.19                             | 1.13 ± 0.14                           | <b>0.68</b>  |
| Ventrolateral Prefrontal | 1.20 ± 0.10                            | 1.27 ± 0.14                            | <b>0.58</b>  | 1.21 ± 0.08                            | <b>0.11</b>  | 1.32 ± 0.06                            | <b>1.46</b>  | 1.26 ± 0.16                             | 1.30 ± 0.11                           | <b>0.95</b>  |
| Orbitofrontal            | 1.21 ± 0.10                            | <b>1.31 ± 0.13</b>                     | <b>0.86</b>  | 1.22 ± 0.08                            | <b>0.11</b>  | 1.29 ± 0.10                            | <b>0.80</b>  | 1.30 ± 0.13                             | 1.30 ± 0.08                           | <b>0.99</b>  |
| Anterior Cingulate       | 1.44 ± 0.12                            | 1.43 ± 0.17                            | <b>-0.07</b> | 1.49 ± 0.05                            | <b>0.54</b>  | 1.44 ± 0.05                            | <b>0.00</b>  | 1.46 ± 0.08                             | 1.41 ± 0.10                           | <b>-0.27</b> |
| Posterior Cingulate      | 1.24 ± 0.12                            | <b>1.36 ± 0.19</b>                     | <b>0.76</b>  | 1.25 ± 0.06                            | <b>0.11</b>  | 1.36 ± 0.16                            | <b>0.85</b>  | 1.32 ± 0.20                             | <b>1.42 ± 0.11</b>                    | <b>1.56</b>  |
| Superior Parietal        | 0.96 ± 0.12                            | 1.06 ± 0.14                            | <b>0.77</b>  | 0.96 ± 0.12                            | <b>0.00</b>  | 1.05 ± 0.12                            | <b>0.75</b>  | 1.06 ± 0.17                             | 1.10 ± 0.17                           | <b>0.95</b>  |
| Supramarginal Gyrus      | 1.16 ± 0.09                            | <b>1.31 ± 0.15</b>                     | <b>1.21</b>  | 1.17 ± 0.08                            | <b>0.12</b>  | 1.30 ± 0.05                            | <b>1.92</b>  | 1.19 ± 0.17                             | <b>1.35 ± 0.07</b>                    | <b>2.36</b>  |
| Lateral Occipital        | 0.97 ± 0.10                            | <b>1.07 ± 0.12</b>                     | <b>0.91</b>  | 0.94 ± 0.05                            | <b>-0.38</b> | 1.06 ± 0.04                            | <b>1.18</b>  | 1.00 ± 0.16                             | <b>1.21 ± 0.08</b>                    | <b>2.65</b>  |
| Primary Visual Cortex    | 0.96 ± 0.10                            | 1.02 ± 0.12                            | <b>0.54</b>  | 0.96 ± 0.07                            | <b>0.00</b>  | 1.02 ± 0.02                            | <b>0.83</b>  | 0.97 ± 0.03                             | <b>1.15 ± 0.14</b>                    | <b>1.56</b>  |
| Gyrus Angularis          | 1.18 ± 0.13                            | 1.29 ± 0.13                            | <b>0.85</b>  | 1.16 ± 0.09                            | <b>-0.18</b> | 1.33 ± 0.05                            | <b>1.52</b>  | 1.24 ± 0.23                             | <b>1.36 ± 0.10</b>                    | <b>1.55</b>  |
| Temporooccipital         | 1.23 ± 0.12                            | 1.32 ± 0.12                            | <b>0.75</b>  | 1.18 ± 0.08                            | <b>-0.49</b> | 1.38 ± 0.09                            | <b>1.41</b>  | 1.23 ± 0.22                             | 1.36 ± 0.08                           | <b>1.27</b>  |
| Lateral Temporal         | 1.23 ± 0.12                            | <b>1.35 ± 0.12</b>                     | <b>1.00</b>  | 1.22 ± 0.09                            | <b>-0.09</b> | 1.28 ± 0.03                            | <b>0.57</b>  | 1.31 ± 0.21                             | 1.34 ± 0.07                           | <b>1.12</b>  |
| Inferior Temporal        | 1.10 ± 0.15                            | <b>1.26 ± 0.21</b>                     | <b>0.88</b>  | 1.08 ± 0.15                            | <b>-0.13</b> | 0.94 ± 0.07                            | <b>-1.37</b> | 1.27 ± 0.37                             | 1.21 ± 0.20                           | <b>0.62</b>  |
| Amygdala                 | 1.75 ± 0.16                            | 1.80 ± 0.14                            | <b>0.33</b>  | 1.81 ± 0.12                            | <b>0.42</b>  | 1.86 ± 0.09                            | <b>0.85</b>  | 1.98 ± 0.09                             | 1.66 ± 0.23                           | <b>-0.45</b> |
| Hippocampus              | 1.60 ± 0.11                            | 1.61 ± 0.12                            | <b>0.09</b>  | 1.62 ± 0.11                            | <b>0.18</b>  | 1.64 ± 0.06                            | <b>0.45</b>  | 1.58 ± 0.20                             | <b>1.44 ± 0.08</b>                    | <b>-1.66</b> |
| Parahippocampus          | 1.36 ± 0.16                            | 1.38 ± 0.17                            | <b>0.12</b>  | 1.37 ± 0.12                            | <b>0.07</b>  | 1.16 ± 0.15                            | <b>-1.29</b> | 1.17 ± 0.44                             | 1.17 ± 0.20                           | <b>-1.05</b> |
| Entorhinal Cortex        | 0.87 ± 0.25                            | 0.78 ± 0.17                            | <b>-0.42</b> | 0.77 ± 0.24                            | <b>-0.41</b> | 0.72 ± 0.20                            | <b>-0.66</b> | 1.00 ± 0.16                             | 0.84 ± 0.29                           | <b>-0.11</b> |
| Caudate                  | 2.44 ± 0.26                            | 2.40 ± 0.27                            | <b>-0.15</b> | 2.37 ± 0.32                            | <b>-0.24</b> | 2.11 ± 0.31                            | <b>-1.15</b> | 2.48 ± 0.28                             | 2.15 ± 0.15                           | <b>-1.37</b> |
| Putamen                  | 2.16 ± 0.22                            | 2.10 ± 0.09                            | <b>-0.36</b> | 2.19 ± 0.19                            | <b>0.15</b>  | 2.13 ± 0.10                            | <b>-0.18</b> | 2.01 ± 0.15                             | 1.99 ± 0.12                           | <b>-0.96</b> |
| Globus Pallidus          | 1.85 ± 0.09                            | <b>1.74 ± 0.08</b>                     | <b>-1.29</b> | 1.86 ± 0.11                            | <b>0.10</b>  | 1.78 ± 0.04                            | <b>-1.01</b> | 1.81 ± 0.05                             | <b>1.69 ± 0.08</b>                    | <b>-1.88</b> |
| Thalamus                 | 2.26 ± 0.20                            | 2.28 ± 0.14                            | <b>0.12</b>  | 2.28 ± 0.20                            | <b>0.10</b>  | 2.19 ± 0.14                            | <b>-0.41</b> | 2.27 ± 0.04                             | 2.15 ± 0.20                           | <b>-0.55</b> |
| Midbrain                 | 1.27 ± 0.14                            | 1.33 ± 0.14                            | <b>0.43</b>  | 1.26 ± 0.06                            | <b>-0.09</b> | 1.45 ± 0.07                            | <b>1.63</b>  | 1.31 ± 0.15                             | 1.39 ± 0.11                           | <b>0.95</b>  |
| Pons                     | 1.44 ± 0.12                            | 1.49 ± 0.12                            | <b>0.42</b>  | 1.48 ± 0.11                            | <b>0.35</b>  | 1.36 ± 0.02                            | <b>-0.93</b> | 1.56 ± 0.09                             | 1.33 ± 0.14                           | <b>-0.84</b> |

**Abbreviations**

CN: elderly controls; MCI: mild cognitive impairment; AD: Alzheimer's disease; SUVR: Standard Uptake Value Ratio; WM: white matter (reference region)

**In red bold:** Significantly higher than controls ( $p < 0.05$ )

**In blue bold:** Significantly lower than controls ( $p < 0.05$ )

**In green bold:** Cohen's effect size  $d$  against Aβ- CN



**SUPPLEMENTAL TABLE 3. Association between regional <sup>18</sup>F-SMBT-1 binding and brain volumetrics**

| SMBT-1 Region            | Hippocampus<br>(n=73) |        | Grey Matter<br>(n=73) |        | White Matter<br>(n=73) |        | Ventricles<br>(n=73) |        | White Matter<br>Hyperintensities<br>(n=72) |        |
|--------------------------|-----------------------|--------|-----------------------|--------|------------------------|--------|----------------------|--------|--------------------------------------------|--------|
|                          | r                     | p      | r                     | p      | r                      | p      | r                    | p      | r                                          | p      |
| Ventrolateral Prefrontal | -0.016                | 0.893  | 0.004                 | 0.975  | 0.014                  | 0.905  | 0.088                | 0.459  | 0.140                                      | 0.241  |
| Orbitofrontal            | 0.033                 | 0.781  | 0.010                 | 0.933  | 0.083                  | 0.483  | 0.077                | 0.516  | 0.056                                      | 0.638  |
| Anterior Cingulate       | 0.212                 | 0.072  | 0.104                 | 0.383  | -0.105                 | 0.379  | 0.045                | 0.703  | -0.041                                     | 0.734  |
| Posterior Cingulate      | -0.097                | 0.413  | -0.187                | 0.110  | 0.084                  | 0.482  | 0.146                | 0.219  | 0.098                                      | 0.412  |
| Superior Parietal        | -0.188                | 0.112  | -0.192                | 0.104  | 0.134                  | 0.260  | 0.198                | 0.094  | 0.206                                      | 0.083  |
| Supramarginal Gyrus      | -0.228                | 0.052  | -0.280                | 0.017* | 0.069                  | 0.562  | 0.093                | 0.436  | 0.134                                      | 0.262  |
| Lateral Occipital        | -0.282                | 0.016* | -0.225                | 0.055  | 0.145                  | 0.220  | 0.070                | 0.559  | 0.253                                      | 0.032* |
| Primary Visual Cortex    | -0.198                | 0.093  | -0.180                | 0.129  | 0.011                  | 0.928  | 0.035                | 0.766  | 0.279                                      | 0.018* |
| Gyrus Angularis          | -0.159                | 0.180  | -0.170                | 0.150  | 0.149                  | 0.209  | 0.045                | 0.705  | 0.151                                      | 0.206  |
| Temporooccipital         | -0.143                | 0.228  | -0.084                | 0.479  | 0.166                  | 0.161  | 0.011                | 0.930  | 0.042                                      | 0.728  |
| Lat Temporal             | -0.064                | 0.588  | -0.021                | 0.861  | 0.210                  | 0.074  | 0.007                | 0.954  | -0.017                                     | 0.885  |
| Inferior Temporal        | -0.007                | 0.957  | -0.042                | 0.722  | 0.323                  | 0.005* | -0.169               | 0.153  | 0.022                                      | 0.855  |
| Amygdala                 | 0.118                 | 0.322  | 0.166                 | 0.160  | 0.427                  | 0.000* | -0.073               | 0.542  | 0.037                                      | 0.761  |
| Hippocampus              | 0.343                 | 0.003* | 0.337                 | 0.004* | 0.232                  | 0.048* | -0.071               | 0.554  | -0.231                                     | 0.051  |
| Parahippocampus          | 0.338                 | 0.004* | 0.331                 | 0.004* | 0.080                  | 0.499  | -0.274               | 0.019* | -0.253                                     | 0.032  |
| Entorhinal               | 0.031                 | 0.792  | 0.034                 | 0.775  | 0.052                  | 0.662  | -0.013               | 0.911  | 0.132                                      | 0.268  |
| Caudate                  | 0.201                 | 0.089  | 0.303                 | 0.009* | -0.063                 | 0.594  | -0.198               | 0.093  | -0.170                                     | 0.155  |
| Putamen                  | -0.018                | 0.883  | 0.197                 | 0.129  | -0.194                 | 0.101  | 0.060                | 0.616  | -0.058                                     | 0.630  |
| Globus Pallidus          | 0.115                 | 0.332  | 0.321                 | 0.006* | 0.130                  | 0.273  | -0.056               | 0.636  | -0.056                                     | 0.639  |
| Thalamus                 | 0.235                 | 0.046* | 0.303                 | 0.009* | 0.062                  | 0.604  | -0.151               | 0.203  | -0.074                                     | 0.539  |
| Midbrain                 | 0.069                 | 0.560  | 0.163                 | 0.171  | 0.347                  | 0.003* | 0.002                | 0.984  | -0.007                                     | 0.951  |
| Pons                     | 0.163                 | 0.169  | 0.250                 | 0.033* | 0.221                  | 0.060  | -0.050               | 0.678  | -0.137                                     | 0.252  |
| Aβ burden (CL)           | -0.432                | 0.000* | -0.449                | 0.000* | -0.031                 | 0.793  | 0.207                | 0.078  | 0.218                                      | 0.065  |
| Tau burden (SUVR)        | -0.358                | 0.003* | -0.410                | 0.001* | 0.018                  | 0.886  | 0.204                | 0.093  | -0.184                                     | 0.129  |

\*Significantly associated ( $p < 0.05$ )
